# Supplementary material for: Transcriptomic Analysis and C-Terminal Epitope Tagging Reveal Differential Processing and Signaling of Endogenous TLR3 and TLR7
Source: PubMed Central journal article supplement (PMC8240634; doi:10.3389/fimmu.2021.686060), 2021-06-15
Supplement: DataSheet_1.pdf [file DataSheet_1.pdf]

# Supplementary Material

## Supplementary Figures and Tables

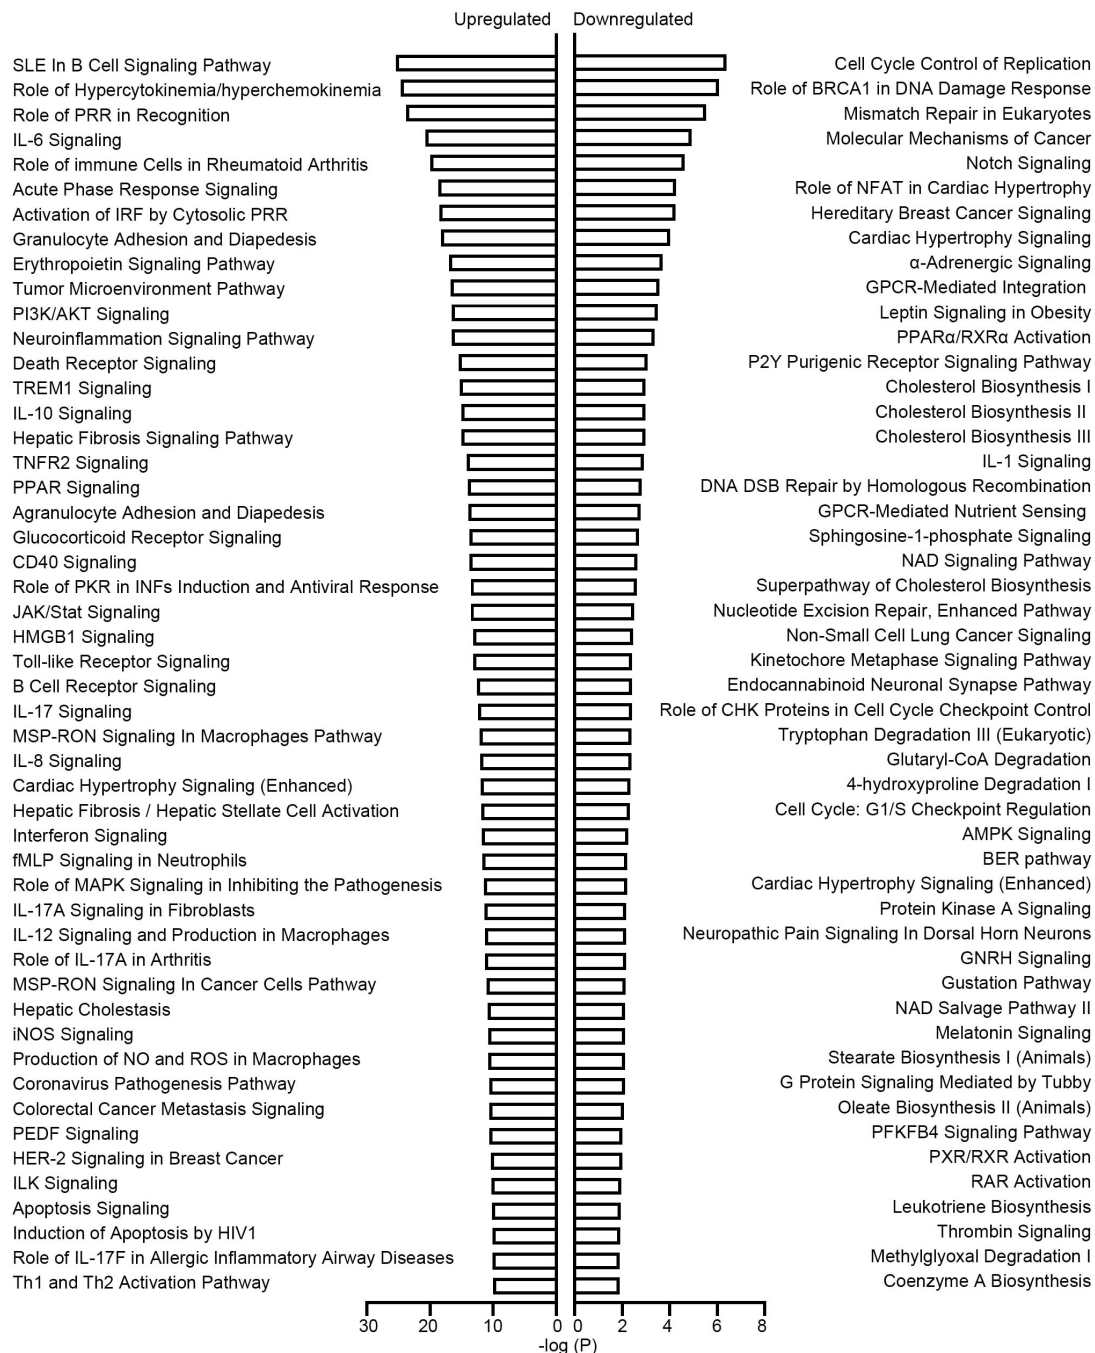

**Supplementary Figure 1. Top 50 canonical signaling pathways of shared target genes of TLR3 and TLR7.** Ingenuity Pathway Analysis (IPA) was performed to investigate the involvement of shared target genes of TLR3 and TLR7 in various signaling pathways. More than 400 pathways were identified based on criteria of  $-\log(p) > 1$  and a ratio  $> 0.125$ . Only the top 50 pathways are shown here.





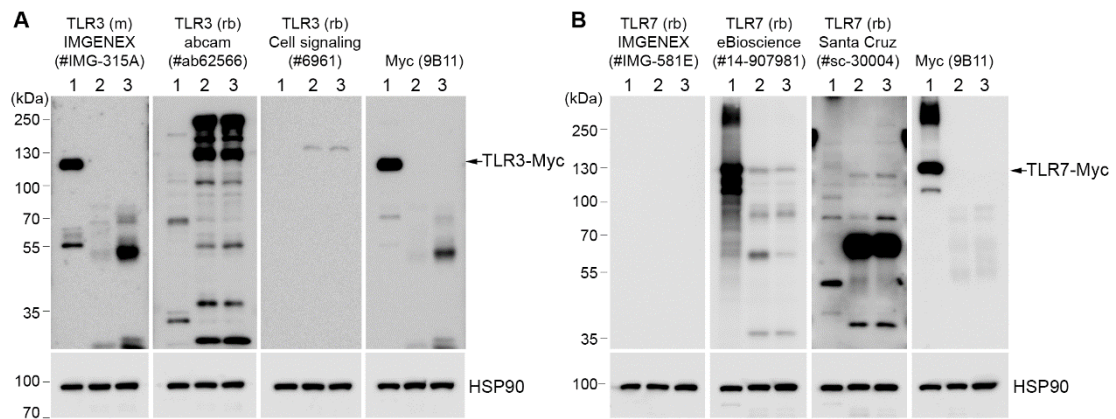

**Supplementary Figure 4. Characterization of commercially available TLR3 and TLR7 antibodies.**

(A) None of the three TLR3 antibodies specifically recognized endogenous TLR3 protein. Lane 1: TLR3-Myc overexpressing HEK293T cell lysate, as a positive control. Lane 2: WT spleen lysate. Lane 3: *Tlr3*<sup>-/-</sup> spleen lysate. (B) Only the TLR7 antibody purchased from eBioscience presented an extract signal (between 55-70 kDa) from WT spleen lysate, presumably representing the cleaved N-terminal fragment of TLR7. Lane 1: TLR7-Myc overexpressing HEK293T cell lysate, as a positive control. Lane 2: WT spleen lysate. Lane 3: *Tlr7*<sup>-/-</sup> spleen lysate. HSP90 was used as a loading control.

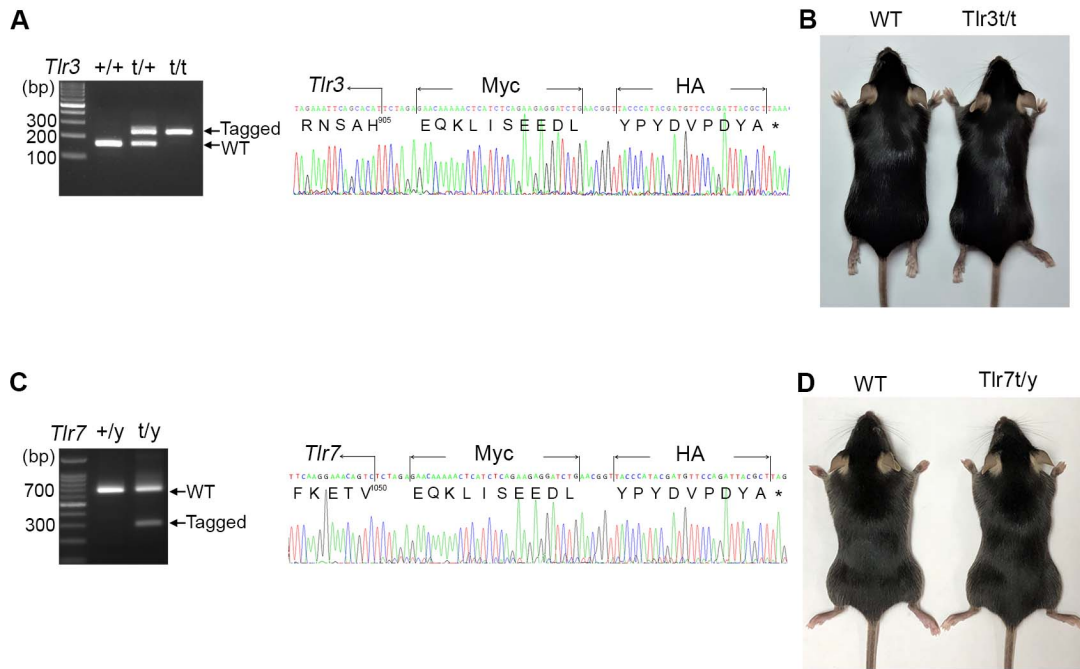

**Supplementary Figure 5. Dual tagging of Myc and HA cassettes at the C-terminal ends of the *Tlr3* and *Tlr7* genes in mice.**

(A) Genotyping results for WT (+/+), *Tlr3*<sup>t/+</sup>, and *Tlr3*<sup>t/t</sup> mice. Primers Tlr3-Fw and Tlr3-Rv were used for genotyping the tagged *Tlr3* mice. Right: Sequencing result for the Myc-HA-tagged *Tlr3* gene. (B) There is no obvious difference in global appearance of WT and *Tlr3*<sup>t/t</sup> mice. (C) Genotyping results for WT (+/+) and *Tlr7*<sup>t/y</sup> mice. Primers (Tlr7-Fw, Tlr7-Rv and HA-Rv) were used for genotyping the tagged *Tlr7* mice. Right: Sequencing result for the Myc-HA-tagged *Tlr7* gene. (D) There is no obvious difference in global appearance of WT and *Tlr7*<sup>t/y</sup> mice.

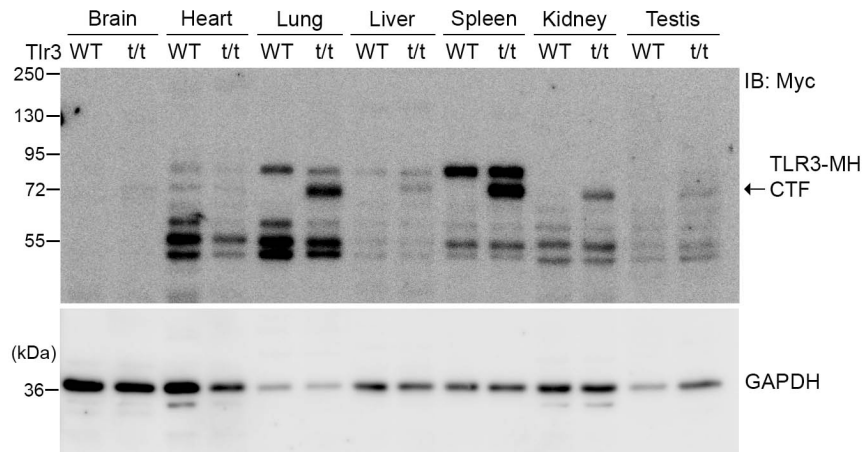

**Supplementary Figure 6. Anti-Myc tag antibody does not clearly detect endogenous TLR3-MH proteins in immunoblotting (IB).**

The lysates used in Figure 2A were also analyzed using another anti-Myc antibody (9B11). However, in contrast to the results using anti-HA antibody, the Myc tag antibody did not detect full length TLR3-MH, though signal for the C-terminal fragment (CTF) of TLR3-MH were observed for spleen, lung and kidney lysates. Therefore, we used anti-HA antibody to detect dual Myc-HA-tagged TLR3 and TLR7 in our analyses. WT: wild-type, CTF: C-terminal fragment of TLR3.

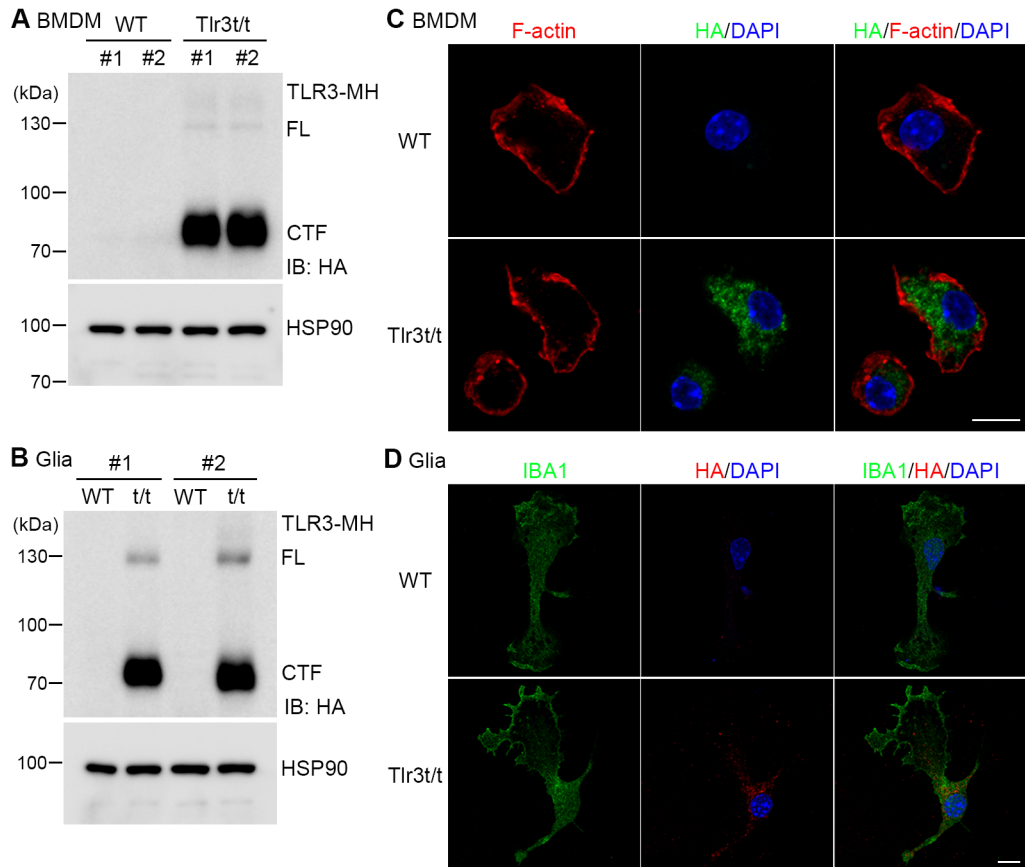

**Supplementary Figure 7. The expression pattern and subcellular localization of TLR3-MH protein in primary cell culture.**

(A, B) Detection of TLR3-MH proteins in cultured BMDMs and glial cells of WT and *Tlr3<sup>t/t</sup>* mice using anti-HA antibody (3F10). HSP90 was used as a loading control. (C) Visualization of TLR3-MH protein expression in BMDMs using immunofluorescence staining with anti-HA antibody (C29F4). F-actin revealed by phalloidin staining was used to outline the cell morphology of BMDMs. (D) Visualization of TLR3-MH protein expression in microglia using immunofluorescence staining with anti-HA antibody (16B12). IBA1 was used as a microglia marker. Counterstaining with DAPI was performed to label the cell nuclei. Scale bar, 10  $\mu$ m.

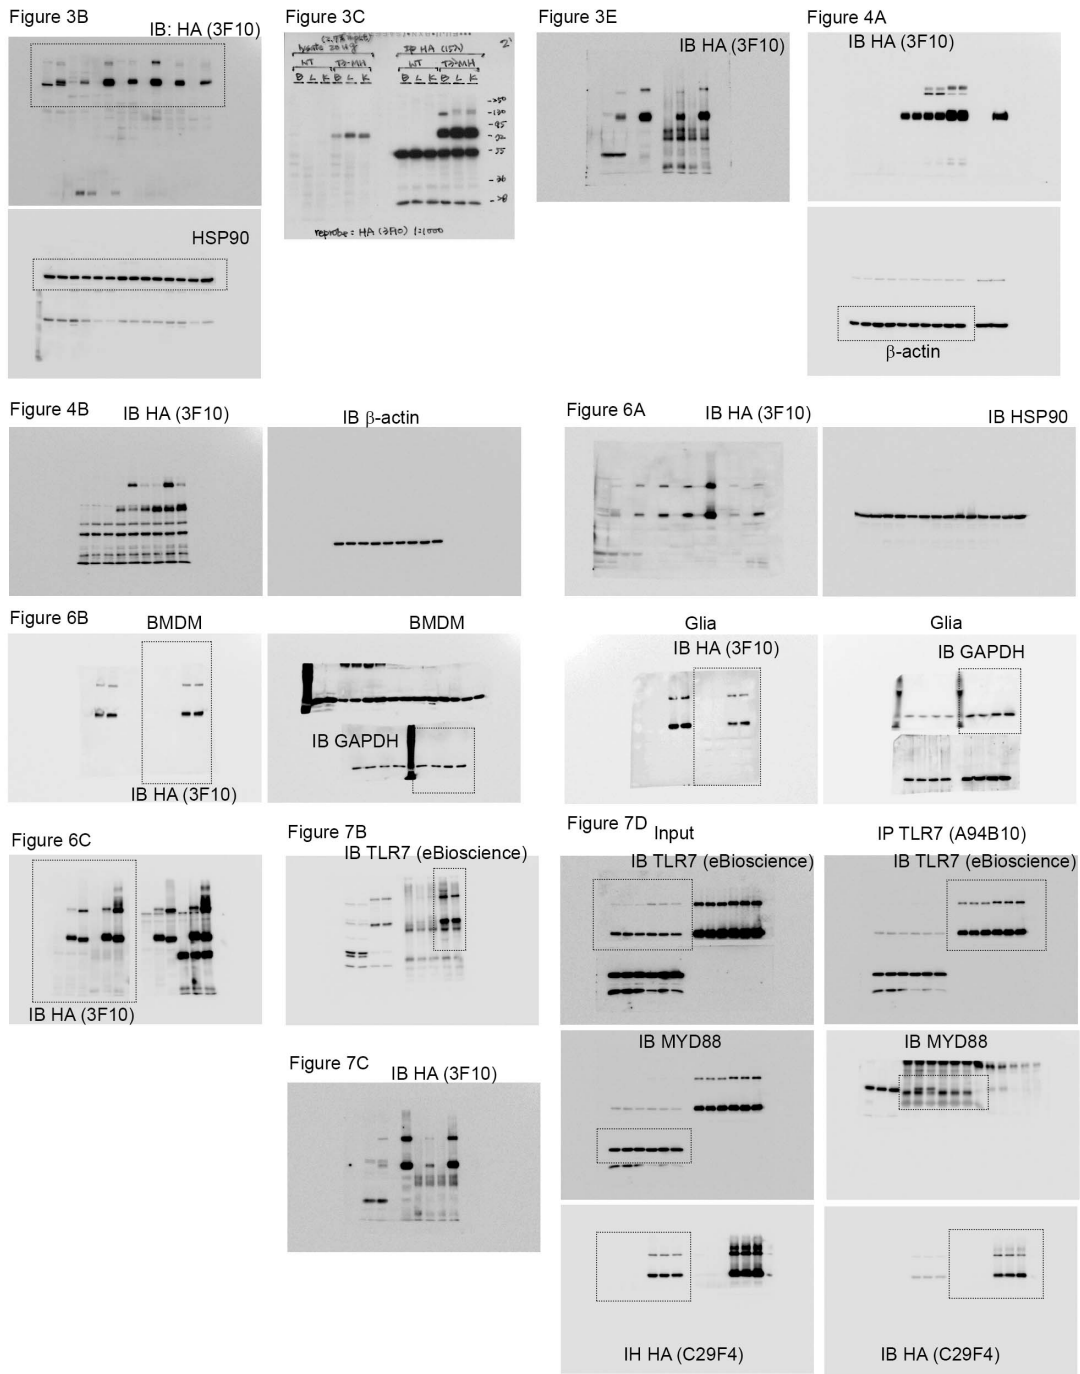

**Supplementary Figure 8. Entire images of immunoblots shown in Figures.**



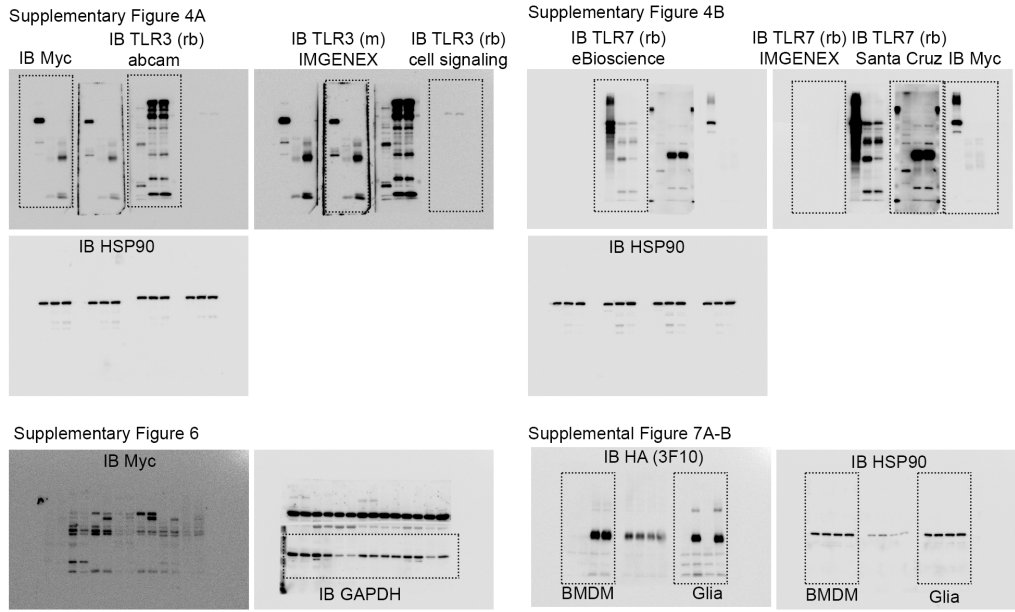

**Supplementary Figure 9. Entire images of immunoblots shown in Supplementary Figures 4, 6, 7.**

**Supplementary Table 2. Antibodies used in the current report**

| Antibody            | Brand and cat.#          | Host and clone #      | Application                                    |
|---------------------|--------------------------|-----------------------|------------------------------------------------|
| HA                  | Roche (11867423001)      | Rat mAb (3F10)        | IB (0.1-0.2 µg/ml)<br>IP (1:250)               |
| HA                  | Cell Signaling (3724)    | Rabbit mAb (C29F4)    | IB (0.5-1 µg/ml)<br>IF (1 µg/ml)<br>IP (1:250) |
| HA                  | Abcam (ab130275)         | Mouse mAb (16B12)     | IF (1:500)                                     |
| Myc                 | Cell Signaling (2276)    | Mouse mAb (9B11)      | IB (1:1000)                                    |
| TLR3                | Dr. Kensuke Miyake       | Mouse mAb (PaT3)      | IP (1:250)                                     |
| TLR3                | IMGENEX (IMG-315A)       | Mouse mAb (40C1285.6) | IB (1:500)                                     |
| TLR3                | Cell Signaling (6961)    | Rabbit mAb (D10F10)   | IB (1:500)                                     |
| TLR3                | Abcam (ab62566)          | Rabbit pAb            | IB (1:500)                                     |
| TLR7                | Dr. Kensuke Miyake       | Mouse mAb (A94B10)    | IP (1:250)                                     |
| TLR7                | IMGENEX (IMG-581E)       | Rabbit pAb            | IB (1:200)                                     |
| TLR7                | eBioscience (14-9079-81) | Rabbit pAb            | IB (1:1000)                                    |
| TLR7                | Santa Cruz (sc-30004)    | Rabbit pAb            | IB (1:200)                                     |
| IBA1                | Wako (019-19741)         | Rabbit pAb            | IF (1:500)                                     |
| GFAP                | Millipore (MAB3402)      | Mouse mAb (GA-5)      | IF (1:500)                                     |
| MYD88               | R&D Systems (AF3109)     | Goat pAb              | IB (0.5 µg/ml)                                 |
| β-actin             | Sigma (A5316)            | Mouse mAb (AC74)      | IB (1:5000)                                    |
| HSP90               | Dr. Chung Wang           | Rabbit pAb            | IB (1:4000)                                    |
| GAPDH               | Santa Cruz (sc-25778)    | Rabbit pAb            | IB (1:1000)                                    |
| Phalloidin-Alexa546 | Invitrogen (A22283)      |                       | IF (1:500)                                     |

\* mAb: monoclonal antibody; pAb: polyclonal antibody; IB: immunoblotting; IF: immunofluorescent staining; IP: immunoprecipitation.

**Supplementary Table 3. Software used in the current report**

| Software and algorithms | Company or website                                                                                                                        |
|-------------------------|-------------------------------------------------------------------------------------------------------------------------------------------|
| Prism 8                 | GraphPad                                                                                                                                  |
| Hisat2                  | <a href="http://daehwankimlab.github.io/hisat2/">http://daehwankimlab.github.io/hisat2/</a>                                               |
| featureCounts           | in Bioconductor Rsubread package                                                                                                          |
| edgeR                   | <a href="http://bioconductor.org/packages/release/bioc/html/edgeR.html">http://bioconductor.org/packages/release/bioc/html/edgeR.html</a> |
| R                       | <a href="https://www.r-project.org/">https://www.r-project.org/</a>                                                                       |
| CLC                     | <a href="http://www.clcbio.com">http://www.clcbio.com</a>                                                                                 |
| Metascape               | <a href="http://metascape.org/gp/index.html#/main/step1">http://metascape.org/gp/index.html#/main/step1</a>                               |
| ImageJ                  | <a href="https://imagej.nih.gov/ij/">https://imagej.nih.gov/ij/</a>                                                                       |

**Supplementary Table 4. Primer pairs and UPL probes for quantitative RT-PCR**

| Gene                          | Primer pairs                       | UPL Probe # |
|-------------------------------|------------------------------------|-------------|
| <i>Tlr3</i>                   | F: GATACAGGGATTGCACCCATA           | 26          |
|                               | R: TCCCCAAAGGAGTACATTAGA           |             |
| <i>Tlr7</i>                   | F: TGATCCTGGCCTATCTCTGAC           | 25          |
|                               | R: CGTGTCCACATCGAAAACAC            |             |
| <i>Il-6</i>                   | F: GCTACCAAACCTGGATATAATCAGGA      | 6           |
|                               | R: CCAGGTAGCTATGGTACTCCAGAA        |             |
| <i>Il-1<math>\beta</math></i> | F: AGTTGACGGACCCCAAAAG             | 38          |
|                               | R: AGCTGGATGCTCTCATCAGG            |             |
| <i>Tnf<math>\alpha</math></i> | F: TTGTCTTAATAACGCTGATTTGGT        | 64          |
|                               | R: GGGAGCAGAGGTTTCAGTGAT           |             |
| <i>Ifn<math>\beta</math></i>  | F: CACAGCCCTCTCCATCAACTA           | 78          |
|                               | R: CATTTCGAATGTTTCGTCCT            |             |
| <i>Ccl3</i>                   | F: TGCCCTTGCTGTTCTTCTCT            | 40          |
|                               | R: GTGGAATCTTCCGGCTGTAG            |             |
| <i>Tlr2</i>                   | F: GGGGCTTCACTTCTCTGCTT            | 50          |
|                               | R: AGCATCCTCTGAGATTTGACG           |             |
| <i>Tlr8</i>                   | F: CAA ACG TTT TAC CTT CCT TTG TCT | 56          |
|                               | R: ATG GAA GAT GGC ACT GGT TC      |             |
| <i>Tlr9</i>                   | F: GAATCCTCCATCTCCCAACAT           | 79          |
|                               | R: CCAGAGTCTCAGCCAGCACT            |             |
| <i>Irf7</i>                   | F: TGTGTCCCCAGGATCATTTTC           | 107         |
|                               | R: CCGGCATCACTAGAAAGCAG            |             |
| <i>Myd88</i>                  | F: TGGCCTTGTTAGACCGTGA             | 17          |
|                               | R: AAGTATTTCTGGCAGTCCTCCTC         |             |
| <i>Trif</i>                   | F: CAGCTCAAGACCCCTACAGC            | 67          |
|                               | R: CTCCCACACAGCCTCGTC              |             |
| <i>Stat3</i>                  | F: TGCAGCAGCTGGACACAC              | 1           |
|                               | R: ACGTGGCATGTGACTCTTTG            |             |
| <i>Ccr3</i>                   | F: GAGCATCAACAACACGTTCC            | 77          |
|                               | R: TGAAAGTGTGATCTTGGGACA           |             |
| <i>Mettl3</i>                 | F: GAAACAGCTGGACTCGCTTC            | 38          |
|                               | R: GCTTCTGGGTTCTTAAATCC            |             |
| <i>Hdac1</i>                  | F: AGCTTCACATCAGCCCTTCT            | 80          |
|                               | R: GGCAGCATCCTCAAGTTCTC            |             |

|              |                            |    |
|--------------|----------------------------|----|
| <i>Hdac4</i> | F: GCAAGATCCTCATTGTAGACTGG | 3  |
|              | R: GAACATTGGGGTCATTGTAGAAG |    |
| <i>Casp3</i> | F: GAGGCTGACTTCCTGTATGCTT  | 80 |
|              | R: AACCACGACCCGTCCTTT      |    |
| <i>Atg7</i>  | F: GCTTTCACCAAACAGATCCA    | 1  |
|              | R: TCGGCTCGACACAGATCAT     |    |
| <i>Hprt</i>  | F: CTCCTCCTCAGACCGCTTT     | 95 |
|              | R: GGTCATCATCGCTAATCACG    |    |
